# Supplementary material
Source: PubMed Central journal article supplement (PMC7402647)
Supplement: mmc1.pdf [file mmc1.pdf]

# THE LANCET

## Infectious Diseases

### Supplementary appendix

This appendix formed part of the original submission. We post it as supplied by the authors.

Supplement to: Joy M, Hobbs FDR, McGagh D, Akinyemi O, de Lusignan S.  
Excess mortality from COVID-19 in an English sentinel network population.  
*Lancet Infect Dis* 2020; published online August 4. [https://doi.org/10.1016/S1473-3099\(20\)30632-0](https://doi.org/10.1016/S1473-3099(20)30632-0).

**Appendix figure 1: Mortality rates across all ages for weeks 2 to 20 of 2018, 2019 and 2020 comparing the Oxford-Royal College of General Practitioners (RCGP) Research and Surveillance Centre (RSC) and the Office for National Statistics (ONS).**

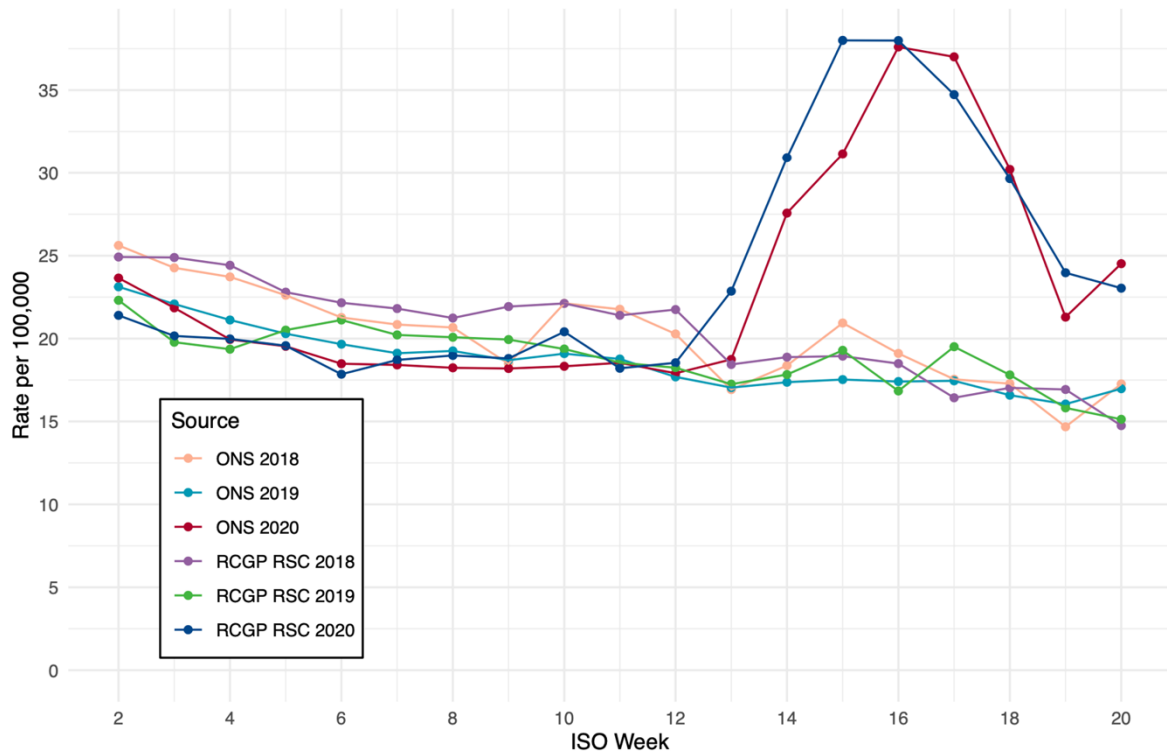

**Appendix table 1: Number of deaths per week across all ages for weeks 2 to 20 of 2020 in the Oxford-Royal College of General Practitioners (RCGP) Research and Surveillance Centre (RSC)**

| <b>Week number</b> | <b>Deaths (n)</b> |
|--------------------|-------------------|
| 2                  | 742               |
| 3                  | 831               |
| 4                  | 846               |
| 5                  | 785               |
| 6                  | 725               |
| 7                  | 736               |
| 8                  | 715               |
| 9                  | 723               |
| 10                 | 790               |
| 11                 | 715               |
| 12                 | 702               |
| 12                 | 848               |
| 14                 | 1172              |
| 15                 | 1353              |
| 16                 | 1394              |
| 17                 | 1253              |
| 18                 | 1092              |
| 19                 | 866               |
| 20                 | 842               |
| Total              | 17130             |
